# Supplementary material
Source: Springer Nature journal article supplement (https://www.springermedizin.de/resource/supplementary/12874_2009_435_MOESM6_ESM.pdf/9432092)

## Survivors.

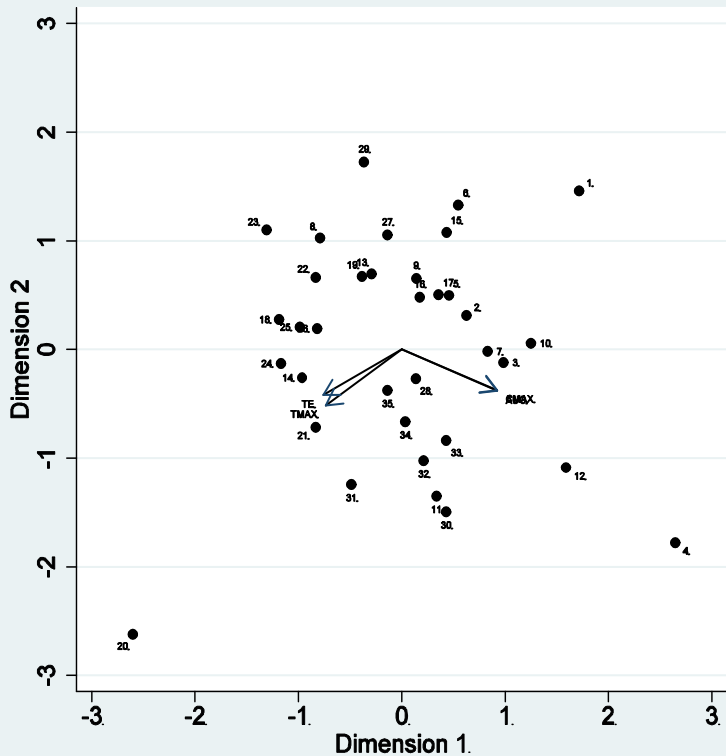

→ Variables. • Observations.

## Non-Survivors.

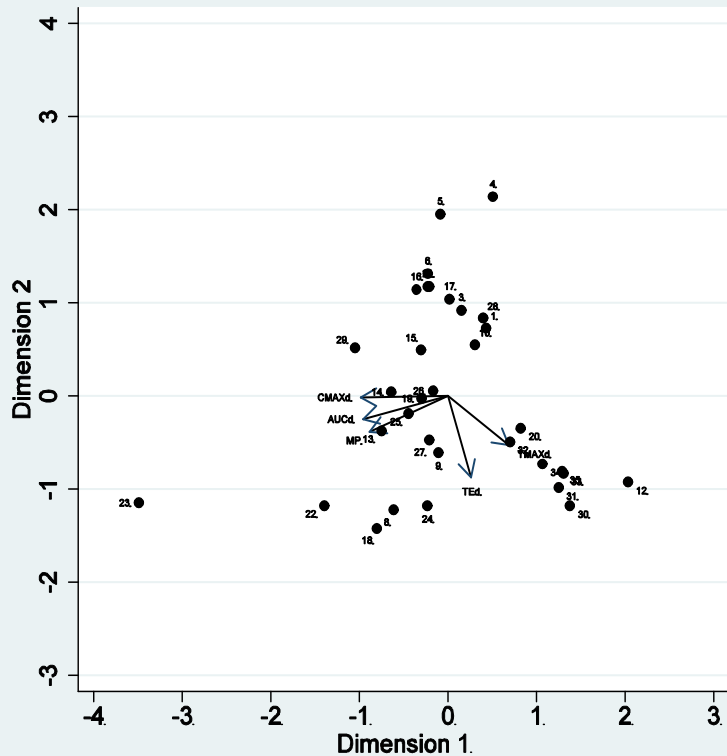

→ Variables. • Observations.

Supplement: MOESM6 [file 9432092]
